# Supplementary material for: Anti-Obesity Effects of Dietary Fibers Extracted from Flaxseed Cake in Diet-Induced Obese Mice
Source: MDPI journal article supplement (doi:10.3390/nu15071718), 2023-03-31
Supplement: s1 [file s1]

**Table S1.** The compositions and heat ratio of the experimental diets.

| Ingredient                               | Diets Compositions (g/100g) |       |       |       |           |
|------------------------------------------|-----------------------------|-------|-------|-------|-----------|
|                                          | CON                         | HFD   | FIDF  | FSDF  | FIDF+FSDF |
| Casin                                    | 18.96                       | 25.85 | 25.85 | 25.85 | 25.85     |
| L-Cystine                                | 0.28                        | 0.39  | 0.39  | 0.39  | 0.39      |
| Corn Starch                              | 47.98                       | 0.00  | 0.00  | 0.00  | 0.00      |
| Maltodextrin                             | 11.85                       | 16.15 | 16.15 | 16.15 | 16.15     |
| Sucrose                                  | 6.52                        | 8.89  | 8.89  | 8.89  | 8.89      |
| Cellulose                                | 4.74                        | 6.46  | 0.00  | 0.00  | 0.00      |
| FIDF                                     | 0.00                        | 0.00  | 6.46  | 0.00  | 3.23      |
| FSDF                                     | 0.00                        | 0.00  | 0.00  | 6.46  | 3.23      |
| Soybean Oil                              | 2.37                        | 3.23  | 3.23  | 3.23  | 3.23      |
| Lard                                     | 1.90                        | 31.66 | 31.66 | 31.66 | 31.66     |
| Mineral Mix<br>S10026                    | 0.95                        | 1.29  | 1.29  | 1.29  | 1.29      |
| Dicalcium<br>Phosphate                   | 1.23                        | 1.68  | 1.68  | 1.68  | 1.68      |
| Calcium Carbonate                        | 0.52                        | 0.71  | 0.71  | 0.71  | 0.71      |
| Potassium Citrate,<br>1 H <sub>2</sub> O | 1.56                        | 2.13  | 2.13  | 2.13  | 2.13      |
| Vitamin Mix<br>V10001                    | 0.95                        | 1.29  | 1.29  | 1.29  | 1.29      |
| Choline Bitartrate                       | 0.19                        | 0.26  | 0.26  | 0.26  | 0.26      |
| Diets Heat Ratio (%)                     |                             |       |       |       |           |
|                                          | CON                         | HFD   | FIDF  | FSDF  | FIDF+FSDF |
| Protein                                  | 20                          | 20    | 20    | 20    | 20        |
| Carbohydrate                             | 70                          | 20    | 20    | 20    | 20        |
| Fat                                      | 10                          | 60    | 60    | 60    | 60        |

CON diet adopted the XTCON50J formulation with energy density of 3.85 kcal/g; HFD diet adopted the XTHF60 formulation with energy density of 5.24 kcal/g; FIDF, FSDF and FIDF+FSDF diet were mainly based upon the XTHF60 formulation with energy density of 5.24 kcal/g. CON, control group; HFD, high-fat diet group; FIDF, group supplemented with FIDF alone; FSDF, group supplemented with FSDF alone; MIX, group supplemented with FIDF and FSDF together.

**Table S2.** Effects of FIDF and FSDF administration on obesity-related parameters.

| Variables                                   | CON                   | HFD             | FIDF                 | FSDF                 | MIX                  |
|---------------------------------------------|-----------------------|-----------------|----------------------|----------------------|----------------------|
| Final body weight (g)                       | 27.13 ± 0.54<br>****  | 41.97 ± 4.31    | 42.57 ± 3.57 ns      | 33.15 ± 1.36<br>**** | 37.29 ± 3.56 *       |
| Total Energy Intake During Treatment (kcal) | 419.66 ± 5.35<br>***  | 557.80 ± 0.94   | 541.47 ± 10.69<br>ns | 531.16 ± 5.92<br>ns  | 548.73 ± 10.14<br>ns |
| Energy Efficiency During Treatment (g/kcal) | 0.0654 ± 0.0008 **    | 0.0753 ± 0.0001 | 0.0786 ± 0.0002 ns   | 0.0624 ± 0.0007 **   | 0.0679 ± 0.0001 *    |
| UA (umol/L)                                 | 114.65 ± 22.49<br>ns  | 118.8 ± 19.61   | 100.95 ± 8.65<br>ns  | 95.42 ± 8.28<br>ns   | 97.35 ± 9.82<br>ns   |
| ALT (U/L)                                   | 480.33 ± 32.75<br>*** | 561.32 ± 23.19  | 560.53 ± 31.36<br>ns | 551.80 ± 28.71<br>ns | 545.23 ± 24.22<br>ns |
| AST (U/L)                                   | 191.32 ± 17.33<br>ns  | 225.38 ± 29.84  | 206.583 ± 21.73 ns   | 174.22 ± 30.36<br>** | 174.68 ± 17.82<br>** |

CON, control group; HFD, high-fat diet group; FIDF, group supplemented with FIDF alone; FSDF, group supplemented with FSDF alone; MIX, group supplemented with FIDF and FSDF together. Data are expressed as mean ± SEM ( $n = 6$ ). \*  $p < 0.05$ , \*\*  $p < 0.01$ , \*\*\*  $p < 0.0001$ , \*\*\*\*  $p < 0.0001$ , ns, not significant; compared with the HFD mice.

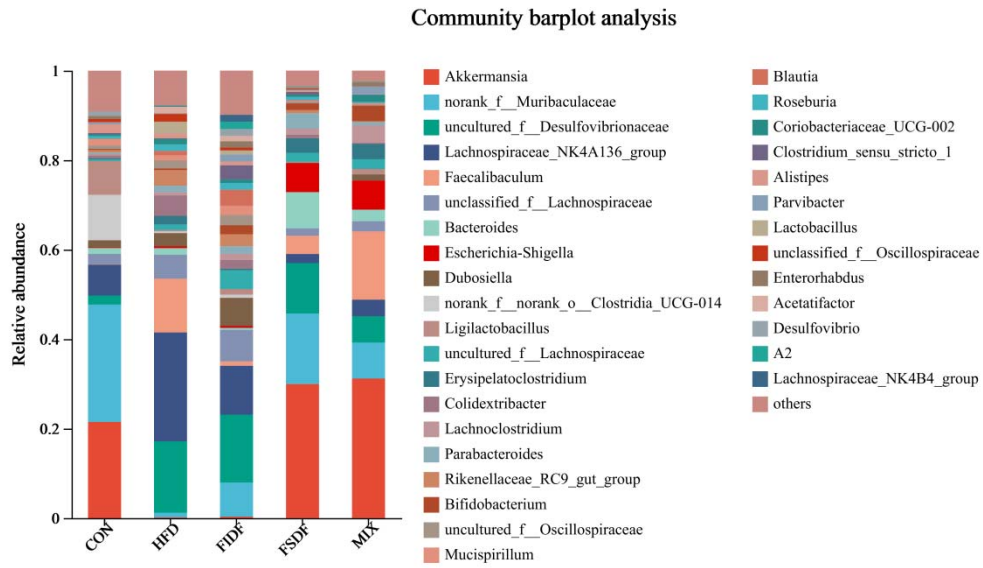

**Figure S1.** Effects of FIDF and FSDF administration on intestinal flora composition at the genus level. CON, control group; HFD, high-fat diet group; FIDF, supplementation with FIDF alone group; FSDF, supplementation with FSDF alone group; MIX, supplementation with FIDF and FSDF together group.
